# Supplementary material for: The greenhouse gas emissions from food consumption in Turkey: a regional analysis with developmental parameters
Source: Royal Society of Chemistry journal article supplement (doi:10.1039/d2fb00027j), 2022-12-08
Supplement: d2fb00027j1.pdf [file d2fb00027j1.pdf]

---

| <b>Food type</b>                   | <b>g CO<sub>2</sub>eq/g food</b> | <b>References</b> |
|------------------------------------|----------------------------------|-------------------|
| Dairy products                     | 1.39                             | (1)               |
| Red meat and meat products         | (beef 28.7, lamb 27.9)           | (1)               |
| Poultry                            | 4.12                             | (1)               |
| Fish and seafoods                  | 4.41                             | (1)               |
| Eggs                               | 3.39                             | (1)               |
| Legumes                            | 0.90                             | (1)               |
| Nuts                               | 5.20                             | (2)               |
| Vegetables                         | 0.47                             | (1)               |
| Fruits                             | 0.50                             | (1)               |
| Bread, cereals and bakery products | 1.38                             | (1)               |
| Oils and fats                      | 1.42                             | (1)               |
| Sugar and sweeteners               | 0.1                              | (3)               |
| Soft drinks                        | 0.2                              | (4)               |

---

**Supplementary Table 1.** Greenhouse gas emissions for food categories used in this study

## References

1. Clune S, Crossin E and Verghese K. Systematic review of greenhouse gas emissions for different fresh food categories. *J Clean Prod*, 2017, 140, 766-783.
2. Tilman D and Clark M. Global diets link environmental sustainability and human health. *Nature*, 2014, 515(7528), 518–522.
3. Scarborough P, Appleby PN, Mizdrak A, Briggs ADM, Travis RC, Bradbury KE and Key TJ. Dietary greenhouse gas emissions of meat-eaters, fish-eaters, vegetarians and vegans in the UK. *Clim Change*, 2014, 125(2), 179–192.
4. Nilsson K, Sund V and Florén B. The environmental impact of the consumption of sweets, crisps and soft drinks. 2011. (cited 2021 March 10). Available from: URL: <http://www.diva-portal.org/smash/get/diva2:702819/FULLTEXT01.pdf>.
